# Supplementary material
Source: HighWire-hosted journal article supplement (https://www.cfp.ca/highwire/filestream/30357/field_highwire_adjunct_files/0/Codeine_ud.pdf)
Supplement: Codeine_ud.pdf [file Codeine_ud.pdf]

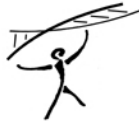

## ☆ **Topic: Codeine and Breast Feeding**

☆ **Summary:** Some women take normal doses of codeine but convert more codeine into the active metabolite morphine than expected. Genetic testing may indicate that these women are ultra-rapid metabolizers of the drug. This would result in significantly higher than normal levels of morphine in breast milk and consequently could cause problematic or lethal levels in the newborn.

Pharmacogenomics, or the interaction between drugs and a person's genetic makeup, is a relatively new field. Drug metabolism can be influenced by genetic variation as well as by other drugs or environmental factors. The clinical application of pharmacogenetic testing is still limited. It is not practical at this time to test every patient for whom codeine is prescribed. Even though most women metabolize codeine at the normal rate, other analgesics such as nonsteroidal anti-inflammatory drugs should generally be used by breast feeding women.

☆ **Bottom line:** It is recommended that analgesics other than codeine be used by nursing mothers. Nursing mothers on codeine should minimize the duration of therapy and monitor their babies for signs of respiratory depression. Genetic testing for drug metabolizer genes is not yet standard practice, but may be available in the future and could be considered following cases of severe adverse drug reactions.

### ✓ **The Disease**

- Pharmacogenomics: The genetic influence on drug metabolism and response.
- Cytochrome P450 enzymes are responsible for the oxidative metabolism of most medications.
- Variation in the activity of these enzymes and therefore drug metabolism is due to both environmental and genetic factors.

### ✓ **The Genes**

- CYP2D6 is one of the Cytochrome P450 superfamily of enzymes.
- It is involved in the metabolism of a number of medications, many used for treatment of psychiatric, neurologic and cardiovascular diseases.
  - These include medications such as fluoxetine, paroxetine, amitriptyline, olanzapine, amiodarone, propranolol and codeine.
- CYP2D6 is part of a minor pathway in the metabolism of codeine (10%) but is the key pathway for analgesic effect.<sup>1</sup>
- CYP2D6 gene function varies among different ethnic groups. The chance of being an ultra-rapid metabolizer (genotype CYP2D6) prevalence is 1/100 for those of Chinese, Japanese and Hispanic descent, 3/100 for African Americans, 1/10 to 1/100 for Caucasians, and 16/100 to 28/100 for those of North African, Ethiopian and Arab descent.<sup>2</sup>

### ✓ **Consequences of having a faulty gene**

- Some genetic variations in CYP2D6 lead to little or no enzyme activity. People with these variants are known as poor metabolizers (PM).
- Other people have multiple copies of CYP2D6 leading to increased metabolism. These people are referred to as ultra rapid metabolizers (UM).
- Most drugs that are metabolized by CYP2D6 are deactivated. PMs would have enhanced drug effect and adverse drug reactions. UMs would have decreased drug effect at conventional doses.

- A few drugs metabolized by CYP2D6 are converted into an active compound (e.g., codeine is converted to morphine). PMs do not get the expected degree of analgesic effect. UM's would experience increased pharmacologic effect.<sup>3</sup>

#### ✓ Testing - for the faulty gene

- Testing is available through US labs that look for genetic variants in a number of Cytochrome P450 genes. This testing is not standard practice, but could be considered following cases of severe adverse drug reactions.

#### ✓ Benefits of genetic testing

- Identification of patients who may have adverse drug reactions
- May help to determine which drug to prescribe and at what dosage

#### ✓ Pitfalls - Watch out for...

- Maternal and neonatal morphine clearance also play an important role in morphine accumulation in the neonate.<sup>4</sup>
- There are additional factors such as other medications that act as inhibitors or inducers of a drug's metabolism.
- Some drugs are metabolized by a number of enzymes so there may be alternate pathways for metabolism making predicting drug metabolism even more complex.

#### ☆References:

1. Dayer P, Desmeules J, Leemann T, Striberni R. Bioactivation of the narcotic drug codeine in human liver is mediated by the polymorphic monooxygenase catalyzing debrisoquine 4-hydroxylation (cytochrome P-450 db1/buffI). *Biochem Biophys Res Commun* 1988;152(1):411-6.
2. Health Canada Advisory 2008 -164, October 8, 2008.
3. Weinshilboum R. Inheritance and drug response. *NEJM* 2003;348;6:529-37.
4. Willmann S, Edginton AN, Coboeken K. Risk to the breast-fed neonate from codeine treatment to the mother: a quantitative mechanistic modeling study. *Clin Pharmacol Ther* 2009;86(6):634-43.

#### ☆Review Articles:

1. Madadi P, Moretti M, Djokanovic N, et al. Guidelines for maternal codeine use during breast feeding. *Canadian Family Physician* 2009;55:1077-8.
2. David SP. Pharmacogenetics. *Primary Care* 2004;31(3):543-59.
3. Caraco Y. Genes and the response to drugs. *NEJM* 2004; 351(27)2867-9.

"Gene Messenger" is for educational purposes only and should not be used as a substitute for clinical judgment. The "GenetiKit" team aims to aid the practicing clinician by providing informed opinions regarding genetic services that have been developed in a rigorous and evidence-based manner. Physicians must use their own clinical judgment in addition to published articles and the information presented herein. The members of the GenetiKit research team assume no responsibility or liability resulting from the use of information contained on "Gene Messenger."

Updated November 2010  
Funding provided by CIHR

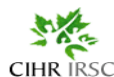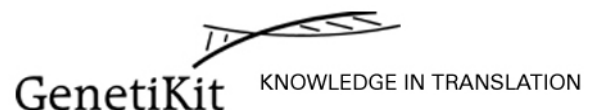

**Dr Carroll** is Principal Investigator of the GenetiKit Project and is the Sydney G Frankfort Chair in Family Medicine at Mount Sinai Hospital and an Associate Professor in the Department of Family Medicine at the University of Toronto.

In alphabetical order, other members of the GenetiKit Team are as follows: **Dr Allanson** is Chief of the Department of Genetics at the Children's Hospital of Eastern Ontario (CHEO) in Ottawa, Ontario and Full Professor in the Department of Pediatrics at the University of Ottawa. **Dr Blaine** is an Assistant Professor in the Department of Family and Community Medicine at the University of Toronto in Ontario and Lead Physician of the STAR Family Health Team in Stratford, Ontario. **Ms Cremin** is a Clinical Assistant Professor in the Department of Medical Genetics, University of British Columbia. **Ms Dorman** is a Genetic Counselor at the Sudbury Regional Hospital in Ontario. **Ms Gibbons** is a Genetic Counselor at the North York General Hospital in Ontario. **Dr Graham** is Vice-President of Knowledge Translation, Canadian Institutes of Health Research. **Dr Grimshaw** is a Professor in the Department of Medicine and Director of the Clinical Epidemiology Program at the Ottawa Health Research Institute. **Ms Honeywell** is an Assistant Professor in the Department of Pediatrics at the University of Ottawa and in the CHEO Departments of Genetics and Cardiology. **Dr Meschino** is a Clinical Geneticist at North York General Hospital and Assistant Professor in the Department of Paediatrics at the University of Toronto. **Ms Permaul** is a Research Associate in the Granovsky Gluskin Family Medicine Centre at Mount Sinai Hospital. **Dr Wilson** is an Associate Professor in the Department of Epidemiology and Community Medicine at the University of Ottawa.
